# Supplementary material for: Interactions between global climate change strategies and local air pollution: lessons learnt from the expansion of the power sector in Brazil
Source: Springer Nature journal article supplement (doi:10.1007/s10584-018-2193-3), 2018-04-26
Supplement: MOESM1 [file 10584_2018_2193_MOESM1_ESM.docx]

# The COPPE-MSB model

MESSAGE[[1]](#footnote-1) is a mixed integer, perfect foresight optimisation model, designed to evaluate different strategies of energy supply development to meet a given demand, which can be exogenous or endogenous. It is included in the category of integrated assessment models (IAMs) that combine techno-economic and environmental variables to generate cost-optimal solutions, which minimise the total cost of expanding the energy system to meet the useful energy demand projected, subject to constraints such as availability of resources, infrastructure, import possibilities, environmental restrictions and regulations, investment limits, availability and price of fuels, and market penetration rates for new technologies, among others, that represent real-world restrictions to the full range of the variable in question.

COPPE-MSB is an expansion of the MESSAGE-Brazil model developed by the Cenergia lab at COPPE/UFRJ (Borba et al., 2012; de Lucena et al., 2009; Herreras-Martínez et al., 2015; Lucena et al., 2015; Nogueira et al., 2014). The most relevant new features introduced include the endogenisation of demand, higher resolution of temporal representation, and the geographical expansion to five distinct regions in Brazil (Rochedo et al., 2015). The COPPE-MSB model generates endogenous demand projections based on GDP and population drivers through elasticities, which are able to respond to energy price signals. The expanded spatial and temporal resolutions of COPPE-MSB also improve the response of the energy supply system to variations of demand given by regional load curves for various energy services demands. COPPE-MSB divides the country into five geographical regions: North, Northeast, South, Southeast and Mid-West. The model divides the year into twelve months, each represented by a typical day with 24 hours, leading to a total of 288 time slices.

Techno-economic parameters that form the input deck of COPPE-MSB are derived from various sources, including available literature, surveys, theses and dissertations conduced at the Energy Planning Program (PPE/COPPE) of the Universidade Federal do Rio de Janeiro. Resource prices, such as oil, gas, and coal are derived from a combination of literature and models developed in-house. Oil prices are the result of recent runs of a multi-Hubbert model based on Brazilian estimates of the Ultimately Recoverable Resources (URR) (Szklo et al., 2007).

# Techno-economic characterisation of evaluated energy systems

**Table 2.1. Characterisation of energy systems modelled in MESSAGE-Brazil.**

|  |  | **Investment cost (US$/kW)** | | **Variable O&M cost (US$/MWh)** | | **Fixed O&M cost (US$/kW/year)** | | **Conversion efficiency** | | **Availability** |
| --- | --- | --- | --- | --- | --- | --- | --- | --- | --- | --- |
| **Power plant options** | | **2010** | **2050** | **2010** | **2050** | **2010** | **2050** | **2010** | **2050** | **2010 - 2050** |
| Coala | |  |  |  |  |  |  |  |  |  |
|  | Domestic coal-FBC | 3690 | 2500 | 4.6 | 3.1 | 39 | 26 | 0.38 | 0.42 | 0.85 |
|  | FBC with CCS | 4190 | 3000 | 8.1 | 6.2 | 91 | 78 | 0.22 | 0.34 | 0.85 |
|  | Pulverized imported coal -PC | 2000 | 2000 | 5.6 | 5.6 | 38 | 38 | 0.40 | 0.45 | 0.85 |
|  | PC with CCS | 2500 | 2500 | 9.1 | 9.1 | 90 | 90 | 0.23 | 0.36 | 0.85 |
|  | IGCC (imported coal) | 2400 | 2400 | 3.5 | 3.5 | 28 | 28 | 0.40 | 0.48 | 0.85 |
|  | IGCC with CCS | 2600 | 2600 | 7.1 | 7.1 | 54 | 54 | 0.35 | 0.42 | 0.85 |
|  | Co-firing of domestic coal and biomass | 3690 | 2500 | 4.6 | 3.1 | 39 | 26 | 0.35 | 0.40 | 0.85 |
| Natural gas (NG)b | |  |  |  |  |  |  |  |  |  |
|  | Open cycle -NGOC | 800 | 600 | 3.5 | 3.5 | 20 | 15 | 0.35 | 0.38 | 0.90 |
|  | Combined cycle -NGCC | 1190 | 1000 | 3.5 | 3.5 | 13 | 11 | 0.50 | 0.55 | 0.85 |
|  | NGCC with CCS | 3090 | 3090 | 3.5 | 3.5 | 23 | 23 | 0.43 | 0.43 | 0.85 |
|  | Flexible NGCC | 1300 | 1300 | 3.5 | 3.5 | 13 | 13 | 0.55 | 0.58 | 0.85 |
| Hydroelectric c | |  |  |  |  |  |  |  |  |  |
|  | Small hydroelectric (<30MW) | 2936 | 2936 | 0 | 0 | 65 | 65 | n.a. | n.a. | 0.571 in S1; 0.603 in S2 |
|  | Medium hydroelectric (>30MW; <300MW) | 2513 | 2513 | 0 | 0 | 58 | 58 | n.a. | n.a. | 0.571 in S1; 0.603 in S2 |
|  | Large hydroelectric (>300MW) | 2091 | 2091 | 0 | 0 | 52 | 52 | n.a. | n.a. | 0.522 in S1; 0.538 in S2 |
| Nucleard | | 4000 | 4000 | 0.8 | 0.8 | 136 | 136 | n.a. | n.a. | 0.85 |
| Biomassf | |  |  |  |  |  |  |  |  |  |
|  | Bagasse with backpressure turbines (22 bar) | 800 | 800 | 5.6 | 5.6 | 0 | 0 | 0.25 | 0.25 | 0.90 |
|  | Bagasse with CEST – existing | 959 | 959 | 4.8 | 4.8 | 0 | 0 | 0.25 | 0.25 | 0.90 |
|  | Bagasse with CEST - new | 2712 | 2392 | 4.6 | 4.6 | 0 | 0 | 0.30 | 0.30 | 0.90 |
|  | Bagasse with BIG/GT | 1009 | 1009 | 4.8 | 4.8 | 0 | 0 | 0.40 | 0.40 | 0.80 |
|  | Biomass -steam turbine | 3600 | 2500 | 6.3 | 6.3 | 50 | 50 | 0.28 | 0.28 | 0.60 |
|  | Municipal solid waste -MSW | 7050 | 6210 | 0 | 0 | 211 | 186 | 0.28 | 0.28 | 0.74 |
|  | Diesel | 1000 | 1000 | 14.3 | 14.3 | 0 | 0 | 0.35 | 0.35 | 0.35 |
|  | Heavy fuel oil | 1070 | 1070 | 14.3 | 14.3 | 0 | 0 | 0.30 | 0.33 | 0.55 |
| Non-conventional renewable energy | |  |  |  |  |  |  |  |  |  |
|  | Solar PV-utility scale | 4300 | 1300 | 0 | 0 | 51 | 15 | n.a. | n.a. | 0.17 |
|  | Solar PV-distributed generationg | 5300 | 2000 | 0 | 0 | 22 | 8 | n.a. | n.a. | 0.17 |
|  | Wind onshoref | 1810 | 1547 | 0 | 0 | 42 | 36 | n.a. | n.a. | 0.35 |
|  | Wind offshoref | 5000 | 3000 | 0 | 0 | 60 | 36 | n.a. | n.a. | 0.40 |
|  | Wavef | 6000 | 4500 | 0 | 0 | 20 | 20 | n.a. | n.a. | 0.15 |
|  | CSP-4hTES- back-up fossil boiler h | 5208 | 3315 | 0 | 0 | 85 | 54 | n.a. | n.a. | 0.32 |
|  | CSP-8hTES- back-up fossil boiler h | 6312 | 3912 | 0 | 0 | 103 | 64 | n.a. | n.a. | 0.37 |
|  | CSP-12hTES-back-up fossil boiler h | 7254 | 4422 | 0 | 0 | 118 | 72 | n.a. | n.a. | 0.42 |
|  | CSP-BIO i | 5856 | 3641 | 5.0 | 5.0 | 65 | 65 | 0.57 | 0.57 | 0.51 |
| Notes: Variable O&M cost does not include fuel cost. BIG/GT: biomass integrated gasification/gas turbines. CEST: condensing-extraction steam turbine. FBC: fluidized bed combustion. IGCC: integrated gasification combined cycle. n.a.: not applicable | | | | | | | | | |  |
|  | Sources: |  |  |  |  |  |  |  |  |  |
|  | a (Borba et al., 2012; Hoffmann et al., 2012) | |  |  |  |  |  |  |  |  |
|  | b (IEA, 2013a, 2013b) | | | |  |  |  |  |  |  |
|  | c (Lucena, 2010; Lucena et al., 2010) |  |  |  |  |  |  |  |  |  |
|  | d (Cabrera-Palmer and Rothwell, 2008; Varro and Ha, 2015) | | |  |  |  |  |  |  |  |
|  | e (Borba et al., 2012; IEA, 2012; Irena, 2012; Renewable and Agency, 2015) | |  |  |  |  |  |  |  |  |
|  | f Borba et al. (2012) |  |  |  |  |  |  |  |  |  |
|  | g (IEA, 2014) |  |  |  |  |  |  |  |  |  |
|  | h (Trieb et al., 2014). A back-up fossil boiler is considered within the investment cost. Nevertheless, for this project. this boiler cannot be used for electricity production. | | | | | | |  |  |  |
|  | i (Soria et al., 2015) |  |  |  |  |  |  |  |  |  |

# Installed capacity of power generation scenarios

**Table 3.1. Power generation installed capacity of baseline and low-carbon scenarios (GW).**

|  |  | **Nuclear** | **Coal** | **Coal CCS** | **NG** | **HFO** | **Diesel** | **Bagasse** | **Hydro** | **Wind** | **PV-solar** | **Total** |
| --- | --- | --- | --- | --- | --- | --- | --- | --- | --- | --- | --- | --- |
| **2010** | **Baseline** | 2.0 | 6.1 | 0.0 | 15.4 | 4.0 | 4.4 | 6.5 | 81.6 | 4.0 | 0.0 | 124.0 |
| **2020** | **Baseline** | 2.0 | 6.6 | 0.0 | 21.0 | 5.1 | 2.0 | 12.3 | 93.3 | 17.4 | 9.7 | 169.4 |
| **LC0** | 2.0 | 6.1 | 0.0 | 21.5 | 6.0 | 2.0 | 9.0 | 83.8 | 29.0 | 9.2 | 168.6 |
| **LC100** | 2.0 | 6.1 | 0.0 | 21.5 | 6.0 | 2.0 | 9.0 | 83.8 | 29.0 | 9.7 | 169.1 |
| **2030** | **Baseline** | 3.5 | 6.6 | 0.0 | 17.2 | 4.9 | 1.5 | 13.7 | 93.3 | 17.4 | 10.1 | 168.1 |
| **LC0** | 3.5 | 6.1 | 0.0 | 17.4 | 5.9 | 1.5 | 9.9 | 83.8 | 29.0 | 9.9 | 167.0 |
| **LC100** | 3.5 | 6.1 | 0.3 | 17.4 | 5.9 | 1.5 | 11.7 | 83.8 | 29.0 | 9.9 | 169.1 |
| **2040** | **Baseline** | 3.5 | 16.0 | 0.0 | 14.1 | 1.7 | 0.6 | 16.6 | 107.4 | 25.3 | 10.7 | 196.0 |
| **LC0** | 3.5 | 12.3 | 0.0 | 11.2 | 1.3 | 0.6 | 13.3 | 88.7 | 42.1 | 10.2 | 183.2 |
| **LC100** | 3.5 | 5.7 | 3.0 | 11.2 | 1.3 | 0.6 | 14.9 | 88.8 | 42.1 | 10.2 | 181.1 |
| **2050** | **Baseline** | 3.5 | 29.5 | 0.0 | 7.7 | 0.4 | 0.5 | 10.5 | 118.3 | 17.4 | 16.0 | 203.8 |
| **LC0** | 3.5 | 19.7 | 0.0 | 6.3 | 0.2 | 0.5 | 20.9 | 88.8 | 42.1 | 11.6 | 193.4 |
| **LC100** | 3.5 | 4.2 | 5.2 | 6.3 | 0.2 | 0.5 | 24.7 | 89.7 | 42.1 | 11.6 | 188.0 |

# Emission factors of GHG and airborne pollutants

**Table 4.1. GHG emission factors of power generation technologies in 2050 (g/kWh).**

| **Technologies** | | **CO2** | **CH4** | **N2O** |
| --- | --- | --- | --- | --- |
| **NPP** | **PWR** | 0.00 | 0.00 | 0.00 |
| **Fossil fuel-based technologies** | **Coal_pp_BR** | 1134.43 | 0.01 | 0.01 |
| **Coal_pp_BR_CCS** | 200.19 | 0.01 | 0.01 |
| **Coal_pp_Imp** | 883.80 | 0.01 | 0.00 |
| **Coal_pp_Imp_CCS** | 101.01 | 0.01 | 0.01 |
| **Coal_pp_Cof** | 618.66 | 0.09 | 0.01 |
| **NG_OC** | 577.11 | 0.04 | 0.01 |
| **NG_CC** | 461.69 | 0.01 | 0.02 |
| **NG_CC_CCS** | 69.79 | 0.01 | 0.03 |
| **NG_H2** | 0.00 | 0.00 | 0.00 |
| **HFO** | 843.43 | 0.01 | 0.00 |
| **Diesel** | 889.80 | 0.01 | 0.00 |
| **Renewable-based technologies** | **Forestry residues** | 0.00 | 0.39 | 0.05 |
| **Forestry residues_CCS** | -1625.27 | 0.49 | 0.07 |
| **Bagasse** | 0.00 | 0.39 | 0.05 |
| **Bagasse_CCS** | -1285.48 | 0.49 | 0.07 |
| **Biomass_H2_CCGT** | 0.00 | 0.00 | 0.00 |
| **Hydro** | 0.00 | 0.00 | 0.00 |
| **Wind** | 0.00 | 0.00 | 0.00 |
| **Solar** | 0.00 | 0.00 | 0.00 |
| **Solar_CSP** | 0.00 | 0.00 | 0.00 |
| **Solar_CSP_hybrid_Biomass_8h** | 0.00 | 0.13 | 0.02 |
| **Solar_CSP_hybrid_NG_8h** | 153.90 | 0.00 | 0.01 |
| **EtOH stationary engine** | 0.00 | 0.02 | 0.00 |

Source: Elaborated by the authors.

**Table 4.2. Particulate matter formation and terrestrial acidification pollutant emission factors of power generation technologies in 2050 (g/kWh).**

| **Technologies** | | **SO2** | **NOx** | **PM10** |
| --- | --- | --- | --- | --- |
| **NPP** | **PWR** | 0.00 | 0.00 | 0.00 |
| **Fossil fuel-based technologies** | **Coal_pp_BR** | 3.81 | 2.51 | 0.09 |
| **Coal_pp_BR_CCS** | 1.01 | 4.16 | 0.15 |
| **Coal_pp_Imp** | 2.85 | 2.22 | 0.07 |
| **Coal_pp_Imp_CCS** | 0.49 | 2.39 | 0.08 |
| **Coal_pp_Cof** | 2.01 | 1.87 | 0.47 |
| **NG_OC** | 0.00 | 0.80 | 0.01 |
| **NG_CC** | 0.00 | 0.64 | 0.01 |
| **NG_CC_CCS** | 0.00 | 0.75 | 0.01 |
| **NG_H2** | 0.00 | 0.00 | 0.00 |
| **HFO** | 1.73 | 1.55 | 0.27 |
| **Diesel** | 1.90 | 1.70 | 0.30 |
| **Renewable-based technologies** | **Forestry residues** | 0.06 | 1.04 | 1.99 |
| **Forestry residues_CCS** | 0.01 | 1.25 | 2.38 |
| **Bagasse** | 0.62 | 1.04 | 1.99 |
| **Bagasse_CCS** | 0.12 | 1.25 | 2.38 |
| **Biomass_H2_CCGT** | 0.04 | 0.68 | 0.00 |
| **Hydro** | 0.00 | 0.00 | 0.00 |
| **Wind** | 0.00 | 0.00 | 0.00 |
| **Solar** | 0.00 | 0.00 | 0.00 |
| **Solar_CSP** | 0.00 | 0.00 | 0.00 |
| **Solar_CSP_hybrid_Biomass_8h** | 0.02 | 0.35 | 0.66 |
| **Solar_CSP_hybrid_NG_8h** | 0.00 | 0.21 | 0.00 |
| **EtOH stationary engine** | 0.00 | 0.66 | 0.00 |

Source: Elaborated by the authors.

**Table 4.3. Human toxicity airborne pollutant emissions factors of power generation technologies in 2050 (g.kWh).**

| **Technologies** | | **Pb** | **Cd** | **Hg** | **As** | **Cr** | **Cu** | **Ni** | **Se** | **Zn** | **PCB** | **PCDD/F** | **Benzo(a)**  **pyrene** | **Benzo(b)**  **fluoranthene** | **Benzo(k)**  **fluoranthene** | **HCB** |
| --- | --- | --- | --- | --- | --- | --- | --- | --- | --- | --- | --- | --- | --- | --- | --- | --- |
| **NPP** | **PWR** | 0.0E+00 | 0.0E+00 | 0.0E+00 | 0.0E+00 | 0.0E+00 | 0.0E+00 | 0.0E+00 | 0.0E+00 | 0.0E+00 | 0.0E+00 | 0.0E+00 | 0.0E+00 | 0.0E+00 | 0.0E+00 | 0.0E+00 |
| **Fossil fuel-based technologies** | **Coal_pp_BR** | 8.8E-05 | 1.1E-05 | 1.7E-05 | 8.5E-05 | 5.4E-05 | 9.4E-05 | 5.9E-05 | 2.8E-04 | 2.3E-04 | 4.0E-11 | 1.2E-10 | 8.4E-09 | 4.4E-07 | 3.5E-07 | 8.0E-08 |
| **Coal_pp_BR_CCS** | 1.5E-04 | 1.9E-05 | 3.0E-05 | 1.5E-04 | 9.5E-05 | 1.7E-04 | 1.0E-04 | 4.9E-04 | 4.0E-04 | 7.0E-11 | 2.1E-10 | 1.5E-08 | 7.8E-07 | 6.1E-07 | 1.4E-07 |
| **Coal_pp_Imp** | 1.4E-04 | 1.6E-05 | 2.6E-05 | 1.3E-04 | 8.2E-05 | 9.0E-06 | 8.7E-05 | 4.1E-04 | 7.9E-05 | 3.0E-11 | 9.0E-11 | 1.2E-08 | 3.3E-07 | 2.6E-07 | 6.0E-08 |
| **Coal_pp_Imp_CCS** | 1.5E-04 | 1.9E-05 | 3.0E-05 | 1.5E-04 | 9.4E-05 | 1.0E-05 | 1.0E-04 | 4.6E-04 | 9.1E-05 | 3.4E-11 | 1.0E-10 | 1.3E-08 | 3.8E-07 | 3.0E-07 | 6.9E-08 |
| **Coal_pp_Cof** | 1.5E-04 | 1.6E-05 | 2.2E-05 | 1.2E-04 | 8.2E-05 | 6.3E-05 | 9.9E-05 | 2.9E-04 | 5.4E-04 | 9.5E-09 | 2.0E-10 | 3.0E-06 | 3.5E-07 | 2.2E-07 | 5.6E-08 |
| **NG_OC** | 1.4E-08 | 2.3E-09 | 9.0E-07 | 1.1E-06 | 6.8E-09 | 6.8E-10 | 4.6E-09 | 1.0E-07 | 1.4E-08 | 0.0E+00 | 0.0E+00 | 5.0E-09 | 1.4E-08 | 1.0E-08 | 0.0E+00 |
| **NG_CC** | 1.1E-08 | 1.8E-09 | 7.2E-07 | 8.6E-07 | 5.5E-09 | 5.5E-10 | 3.7E-09 | 8.1E-08 | 1.1E-08 | 0.0E+00 | 0.0E+00 | 4.0E-09 | 1.1E-08 | 8.0E-09 | 0.0E+00 |
| **NG_CC_CCS** | 1.3E-08 | 2.1E-09 | 8.4E-07 | 1.0E-06 | 6.4E-09 | 6.4E-10 | 4.3E-09 | 9.4E-08 | 1.3E-08 | 0.0E+00 | 0.0E+00 | 4.7E-09 | 1.3E-08 | 9.3E-09 | 0.0E+00 |
| **NG_H2** | 0.0E+00 | 0.0E+00 | 0.0E+00 | 0.0E+00 | 0.0E+00 | 0.0E+00 | 0.0E+00 | 0.0E+00 | 0.0E+00 | 0.0E+00 | 0.0E+00 | 0.0E+00 | 0.0E+00 | 0.0E+00 | 0.0E+00 |
| **HFO** | 4.4E-05 | 1.5E-05 | 1.5E-05 | 2.0E-05 | 1.5E-05 | 3.0E-05 | 1.5E-05 | 7.4E-05 | 2.0E-05 | 1.4E-12 | 1.1E-11 | 1.3E-06 | 5.5E-06 | 1.1E-06 | 2.4E-09 |
| **Diesel** | 4.9E-05 | 1.6E-05 | 1.6E-05 | 2.2E-05 | 1.6E-05 | 3.3E-05 | 1.6E-05 | 8.1E-05 | 2.2E-05 | 1.6E-12 | 1.2E-11 | 1.4E-06 | 6.0E-06 | 1.2E-06 | 2.6E-09 |
| **Renewable-based technologies** | **Forestry residues** | 2.6E-04 | 2.3E-05 | 1.9E-05 | 1.2E-04 | 1.2E-04 | 2.7E-04 | 1.8E-04 | 1.5E-05 | 2.3E-03 | 4.5E-08 | 6.4E-10 | 1.4E-05 | 5.5E-07 | 2.0E-07 | 6.4E-08 |
| **Forestry residues_CCS** | 3.4E-04 | 2.9E-05 | 2.5E-05 | 1.5E-04 | 1.5E-04 | 3.5E-04 | 2.3E-04 | 2.0E-05 | 3.0E-03 | 5.7E-08 | 8.2E-10 | 1.8E-05 | 7.0E-07 | 2.5E-07 | 8.2E-08 |
| **Bagasse** | 2.6E-04 | 2.3E-05 | 1.9E-05 | 1.2E-04 | 1.2E-04 | 2.7E-04 | 1.8E-04 | 1.5E-05 | 2.3E-03 | 4.5E-08 | 6.4E-10 | 1.4E-05 | 5.5E-07 | 2.0E-07 | 6.4E-08 |
| **Bagasse_CCS** | 3.4E-04 | 2.9E-05 | 2.5E-05 | 1.5E-04 | 1.5E-04 | 3.5E-04 | 2.3E-04 | 2.0E-05 | 3.0E-03 | 5.7E-08 | 8.2E-10 | 1.8E-05 | 7.0E-07 | 2.5E-07 | 8.2E-08 |
| **Biomass_H2_CCGT** | 0.0E+00 | 0.0E+00 | 0.0E+00 | 0.0E+00 | 0.0E+00 | 0.0E+00 | 0.0E+00 | 0.0E+00 | 0.0E+00 | 0.0E+00 | 0.0E+00 | 0.0E+00 | 0.0E+00 | 0.0E+00 | 0.0E+00 |
| **Hydro** | 0.0E+00 | 0.0E+00 | 0.0E+00 | 0.0E+00 | 0.0E+00 | 0.0E+00 | 0.0E+00 | 0.0E+00 | 0.0E+00 | 0.0E+00 | 0.0E+00 | 0.0E+00 | 0.0E+00 | 0.0E+00 | 0.0E+00 |
| **Wind** | 0.0E+00 | 0.0E+00 | 0.0E+00 | 0.0E+00 | 0.0E+00 | 0.0E+00 | 0.0E+00 | 0.0E+00 | 0.0E+00 | 0.0E+00 | 0.0E+00 | 0.0E+00 | 0.0E+00 | 0.0E+00 | 0.0E+00 |
| **Solar** | 0.0E+00 | 0.0E+00 | 0.0E+00 | 0.0E+00 | 0.0E+00 | 0.0E+00 | 0.0E+00 | 0.0E+00 | 0.0E+00 | 0.0E+00 | 0.0E+00 | 0.0E+00 | 0.0E+00 | 0.0E+00 | 0.0E+00 |
| **Solar_CSP** | 0.0E+00 | 0.0E+00 | 0.0E+00 | 0.0E+00 | 0.0E+00 | 0.0E+00 | 0.0E+00 | 0.0E+00 | 0.0E+00 | 0.0E+00 | 0.0E+00 | 0.0E+00 | 0.0E+00 | 0.0E+00 | 0.0E+00 |
| **Solar_CSP_hybrid_Biomass_8h** | 8.8E-05 | 7.5E-06 | 6.5E-06 | 4.1E-05 | 3.9E-05 | 9.0E-05 | 6.1E-05 | 5.1E-06 | 7.8E-04 | 1.5E-08 | 2.1E-10 | 4.8E-06 | 1.8E-07 | 6.6E-08 | 2.1E-08 |
| **Solar_CSP_hybrid_NG_8h** | 3.6E-09 | 6.0E-10 | 2.4E-07 | 2.9E-07 | 1.8E-09 | 1.8E-10 | 1.2E-09 | 2.7E-08 | 3.6E-09 | 0.0E+00 | 0.0E+00 | 1.3E-09 | 3.8E-09 | 2.7E-09 | 0.0E+00 |
| **EtOH stationary engine** | 2.9E-05 | 9.8E-06 | 9.8E-06 | 1.3E-05 | 9.8E-06 | 2.0E-05 | 9.8E-06 | 4.9E-05 | 1.3E-05 | 9.4E-13 | 7.1E-12 | 8.4E-07 | 3.6E-06 | 7.1E-07 | 1.6E-09 |

Source: Elaborated by the authors.

# Characterisation factors of mid-point impacts

**Table 5.1. Characterisation factors of CC. PMF. TAP and HT mid-point impacts**

| **Impact category** | **Pollutant** | **Characterisation factors** |
| --- | --- | --- |
| **Climate change (CC)** | CO2 | 1 |
| CH4 | 34 |
| N2O | 298 |
| **Particulate matter formation (PMF)** | SO2 | 0.20 |
| NOx (as NO2) | 0.22 |
| PM (as PM10) | 1 |
| **Terrestrial acidification potential (TAP)** | SO2 | 1 |
| NOx | 0.71 |
| **Human toxicity (HT)** | Pb | 202.28 |
| Cd | 348.68 |
| Hg | 38996.64 |
| As | 148.10 |
| Cr | 0.01 |
| Cu | 0.09 |
| Ni | 17.51 |
| Se | 382.73 |
| Zn | 1.20 |
| PCB | 37.94 |
| PCDD/F | 8.65 |
| Benzo(a)pyrene | 112.80 |
| Benzo(b)fluoranthene | 112.80 |
| Benzo(k)fluoranthene | 112.80 |
| HCB | 818.23 |

Source: Elaborated by the authors based on EcoInvent (2016); Myhre et al. (2013).

**References:**

Borba, B.S.M.C., Lucena, A.F.P., Rathmann, R., Costa, I.V.L., Nogueira, L.P.P., Rochedo, P.R.R., Castelo Branco, D. a., Júnior, M.F.H., Szklo, A., Schaeffer, R., 2012. Energy-related climate change mitigation in Brazil: Potential, abatement costs and associated policies. Energy Policy 49, 430–441. doi:10.1016/j.enpol.2012.06.040

Cabrera-Palmer, B., Rothwell, G., 2008. Why is Brazil enriching uranium? Energy Policy 36, 2570–2577. doi:10.1016/j.enpol.2008.02.033

EcoInvent, 2016. EcoInvent Database. Characterisation factors spreadsheet. CSV files for importing in SimaPro. ReCiPe version 1.11 (Midpoints) [WWW Document]. URL http://www.lcia-recipe.net/characterisation-and-normalisation-factors (accessed 6.1.16).

Herreras Martínez, S., Koberle, A., Rochedo, P., Schaeffer, R., Lucena, A., Szklo, A., Ashina, S., van Vuuren, D.P., 2015. Possible energy futures for Brazil and Latin America in conservative and stringent mitigation pathways up to 2050. Technol. Forecast. Soc. Change 98, 186–210. doi:doi:10.1016/j.techfore.2015.05.006

Hoffmann, B.S., Szklo, A., Schaeffer, R., 2012. An evaluation of the techno-economic potential of co-firing coal with woody biomass in thermal power plants in the south of Brazil. Biomass and Bioenergy 45, 295–302. doi:10.1016/j.biombioe.2012.06.016

IEA, 2014. Technology Roadmap Solar Photovoltaic Energy.

IEA, 2013a. World Energy Outlook. Paris.

IEA, 2013b. Brazil Energy Outlook. International Energy Agency. Paris.

IEA, 2012. Hydropower and the environment: Managing the Carbon Balance in Freshwater Reservoirs, guideline from quantitative analysis of net GHG emissions from reservoirs. International Energy Agency. Paris.

Irena, 2012. Renewable Energy Technologies (Cost Analysis series).

Lucena, A.F.P., 2010. Proposta metodológica para avaliação da vulnerabilidade às mudanças climáticas globais no setor hidroelétrico. Universidade Federal do Rio de Janeiro.

Lucena, A.F.P., Clarke, L., Schaeffer, R., Szklo, A., Rochedo, P.R.R., Daenzer, K., Gurgel, A., Kitous, A., Kober, T., 2015. Climate Policy Scenarios in Brazil: A Multi-Model Comparison for Energy. Energy Econ. doi:10.1016/j.eneco.2015.02.005

Lucena, A.F.P., Szklo, A.S., Schaeffer, R., de Souza, R.R., Borba, B.S.M.C., da Costa, I.V.L., Júnior, A.O.P., da Cunha, S.H.F., 2009. The vulnerability of renewable energy to climate change in Brazil. Energy Policy 37, 879–889. doi:10.1016/j.enpol.2008.10.029

Lucena, A.F.P., Szklo, A.S., Schaeffer, R., Dutra, R.M., 2010. The vulnerability of wind power to climate change in Brazil. Renew. Energy 35, 904–912. doi:10.1016/j.renene.2009.10.022

Messner, S., Strubegger, M., 1995. User’s Guide for MESSAGE III, WP-95-69. Laxemburg, Austria.

Myhre, G.; et al, 2013. Anthropogenic and Natural Radiative Forcing, in: Stocker, T.F., D. Qin, G.-K. Plattner, M. Tignor, S.K. Allen, J. Boschung, A. Nauels, Y. Xia, V.B. and P.M.M. (Ed.), Climate Change 2013: The Physical Science Basis. Contribution of Working Group I to the Fifth Assessment Report of the Intergovernmental Panel on Climate Change. Cambridge University Press, Cambridge, United Kingdom and New York, NY, USA.

Nogueira, L.P.P., Frossard Pereira de Lucena, A., Rathmann, R., Rua Rodriguez Rochedo, P., Szklo, A., Schaeffer, R., 2014. Will thermal power plants with CCS play a role in Brazil’s future electric power generation? Int. J. Greenh. Gas Control 24, 115–123. doi:10.1016/j.ijggc.2014.03.002

Renewable, I., Agency, E., 2015. R ENEWABLE E NERGY T ECHNOLOGY I NNOVATION.

Rochedo, P.R., Szklo, A., Lucena, A.F., Schaeffer, R., 2015. How a very detailed representation of energy efficiency options in the objective-function of MESSAGE-Brazil (MSB8000) can affect the penetration of renewables (VRE) into the Brazilian power grid., in: Integrated Assessment Modelling Conference. Potsdam.

Soria, R., Portugal-Pereira, J., Szklo, A., Milani, R., Schaeffer, R., 2015. Hybrid concentrated solar power (CSP)–biomass plants in a semiarid region: A strategy for CSP deployment in Brazil. Energy Policy 86, 57–72. doi:10.1016/j.enpol.2015.06.028

Szklo, A., Machado, G., Schaeffer, R., 2007. Future oil production in Brazil-Estimates based on a Hubbert model. Energy Policy 35, 2360–2367. doi:10.1016/j.enpol.2006.08.014

Trieb, F., Fichter, T., Moser, M., 2014. Concentrating solar power in a sustainable future electricity mix. Sustain. Sci. 9, 47–60. doi:10.1007/s11625-013-0229-1

Varro, L., Ha, J., 2015. Projected Costs of Generating Electricity – 2015 Edition. Paris, France.

1. Model for Energy Supply Strategy Alternatives and their General Environmental Impacts, developed by IIASA Messner and Strubegger, (1995) [↑](#footnote-ref-1)
